# Supplementary material for: Microtissue Culture Provides Clarity on the Relative Chondrogenic and Hypertrophic Response of Bone-Marrow-Derived Stromal Cells to TGF-β1, BMP-2, and GDF-5
Source: Cells. 2023 Dec 23;13(1):37. doi: 10.3390/cells13010037 (PMC10778331; doi:10.3390/cells13010037)
Supplement: Supplementary file 1 [file cells-13-00037-s001.zip › cells-2647953-supplementary.pdf]

| Gene                      |   | Sequence (5' - 3')       |
|---------------------------|---|--------------------------|
| <b>Housekeeping gene</b>  |   |                          |
| <i>GAPDH</i>              | F | ATGGGGAAGGTGAAGGTCG      |
|                           | R | TAAAAGCAGCCCTGGTGACC     |
| <b>Chondrogenic genes</b> |   |                          |
| <i>COL2A1</i>             | F | GGCAATAGCAGGTTACGTACA    |
|                           | R | CGATAACAGTCTTGCCCCACTT   |
| <i>ACAN</i>               | F | TCGAGGACAGCGAGGCC        |
|                           | R | TCGAGGGTGTAGCGTGTAGAGA   |
| <i>SOX9</i>               | F | ACTCCTCCTCCGGCATGAG      |
|                           | R | GCTGCACGTCGGTTTTGG       |
| <b>Hypertrophic genes</b> |   |                          |
| <i>COL10A1</i>            | F | ACTCCCAGCACGCAGAATCCA    |
|                           | R | TGGGCCTTTTATGCCTGTGGGC   |
| <i>SP7</i>                | F | TTCTGCGGCAAGAGGTTCACTC   |
|                           | R | GTGTTTGCTCAGGTGGTCGCTT   |
| <i>ALPL</i>               | F | CGTGGCTAAGAATGTCATCATGTT |
|                           | R | TGGTGGAGCTGACCCTTGA      |
| <i>IHH</i>                | F | ATGAAGGCAAGATCGCTCG      |
|                           | R | GATAGCCAGCGAGTTCAGG      |

**Table S1.** Table S1 includes information related to the primer sequences described in the methods for qRT-PCR reactions.

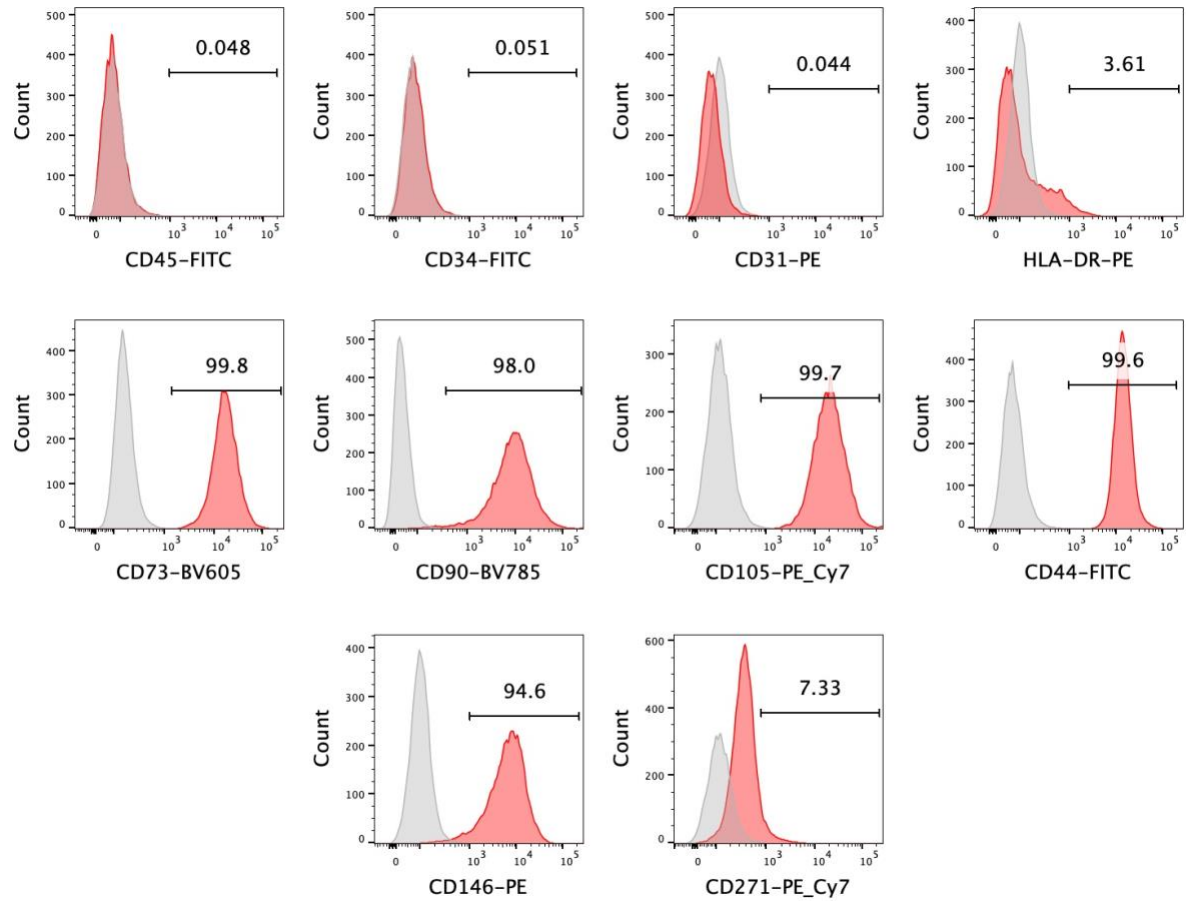

**Figure S1.** BMSC donor 1 flow cytometry characterisation. Cells were negative for haematopoietic cells surface markers, CD45, CD34 and HLA-DR (<5 %) and positive for BMSC-associated surface markers, CD73, CD90, CD105, CD44, and CD146; cells were dim for CD271. Antibody-stained cells are represented by red histograms and isotype controls are grey.

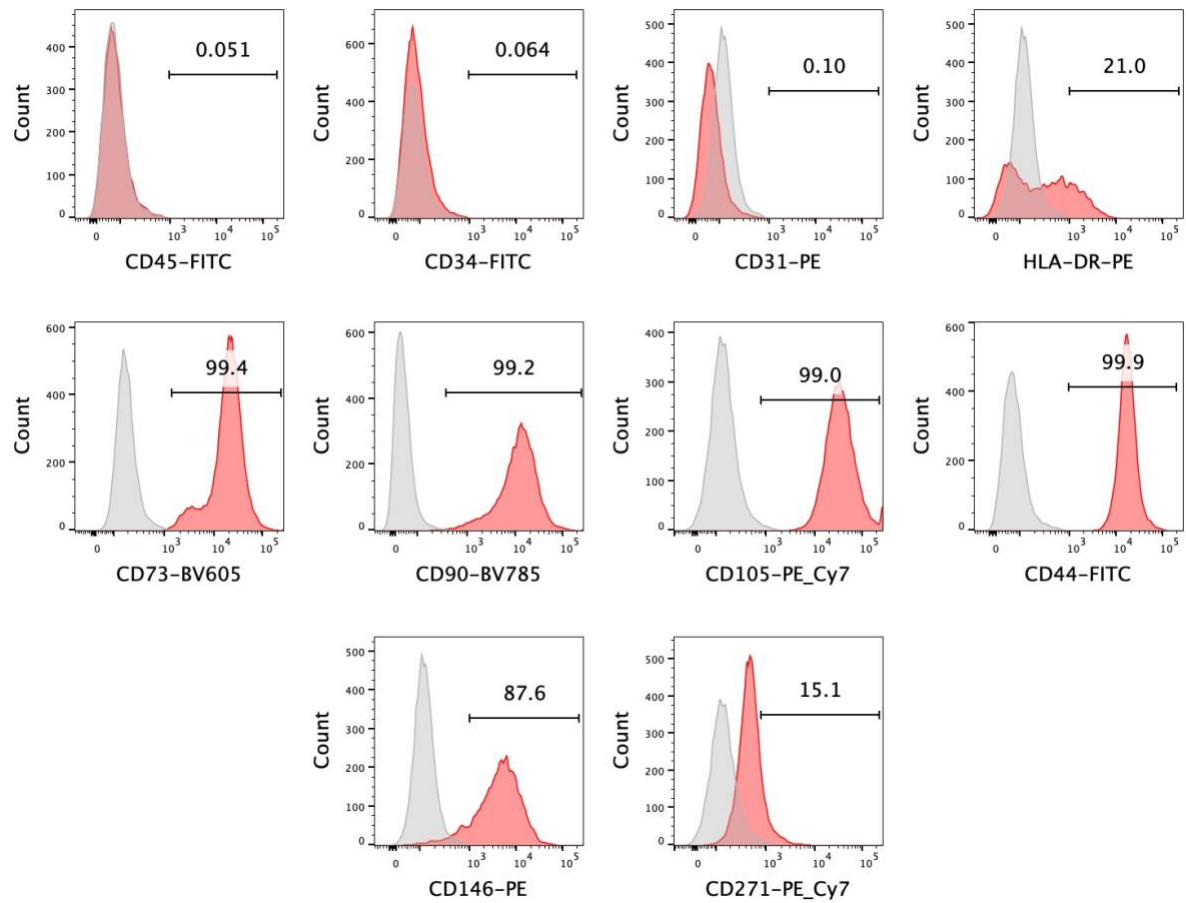

**Figure S2.** BMSC donor 2 flow cytometry characterisation. Cells were negative for haematopoietic cells surface markers, CD45, CD34 and HLA-DR (~21 % positive) and positive for BMSC-associated surface markers, CD73, CD90, CD105, CD44, and CD146; cells were dim for CD271. Antibody-stained cells are represented by red histograms and isotype controls are grey.

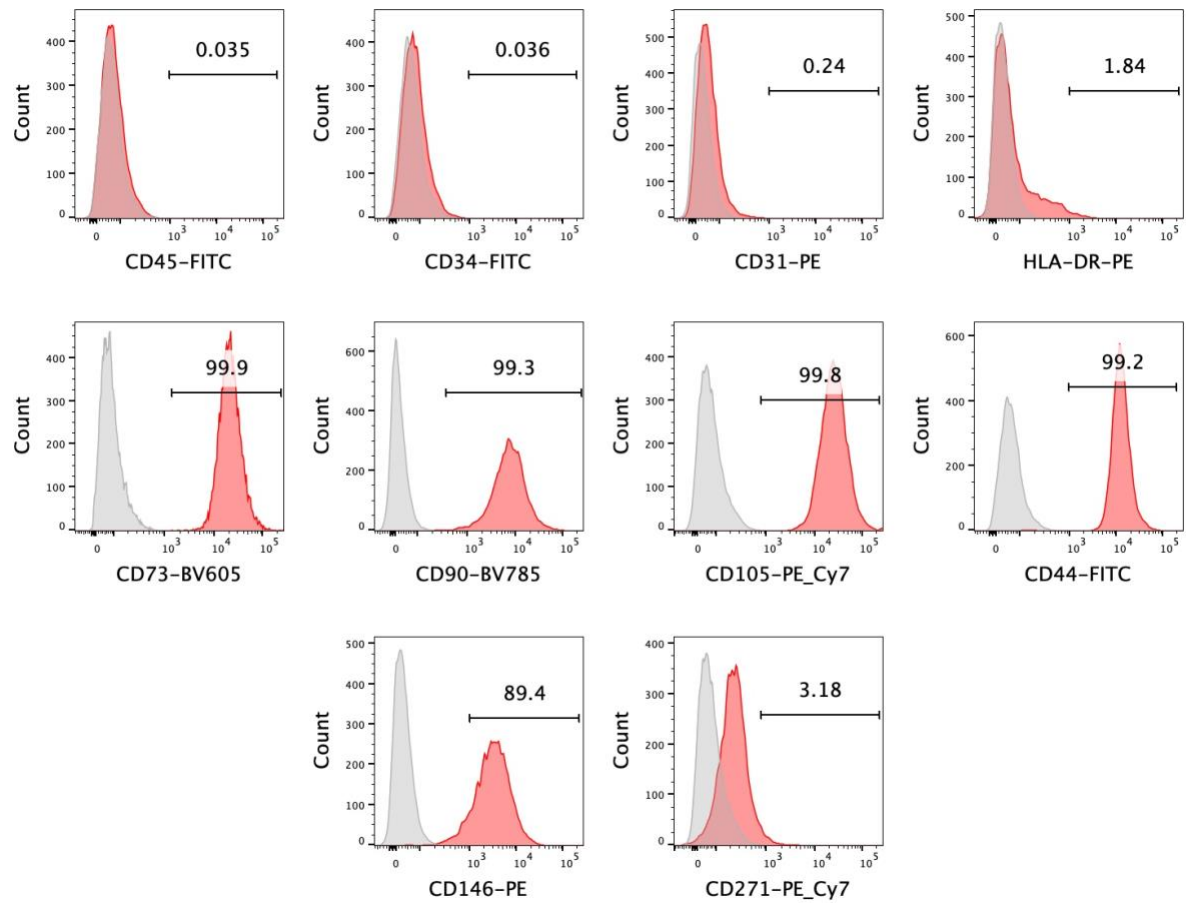

**Figure S3.** BMSC donor 3 flow cytometry characterisation. Cells were negative for haematopoietic cells surface markers, CD45, CD34 and HLA-DR (<5 % positive) and positive for BMSC-associated surface markers, CD73, CD90, CD105, CD44, and CD146; cells were dim for CD271. Antibody-stained cells are represented by red histograms and isotype controls are grey.

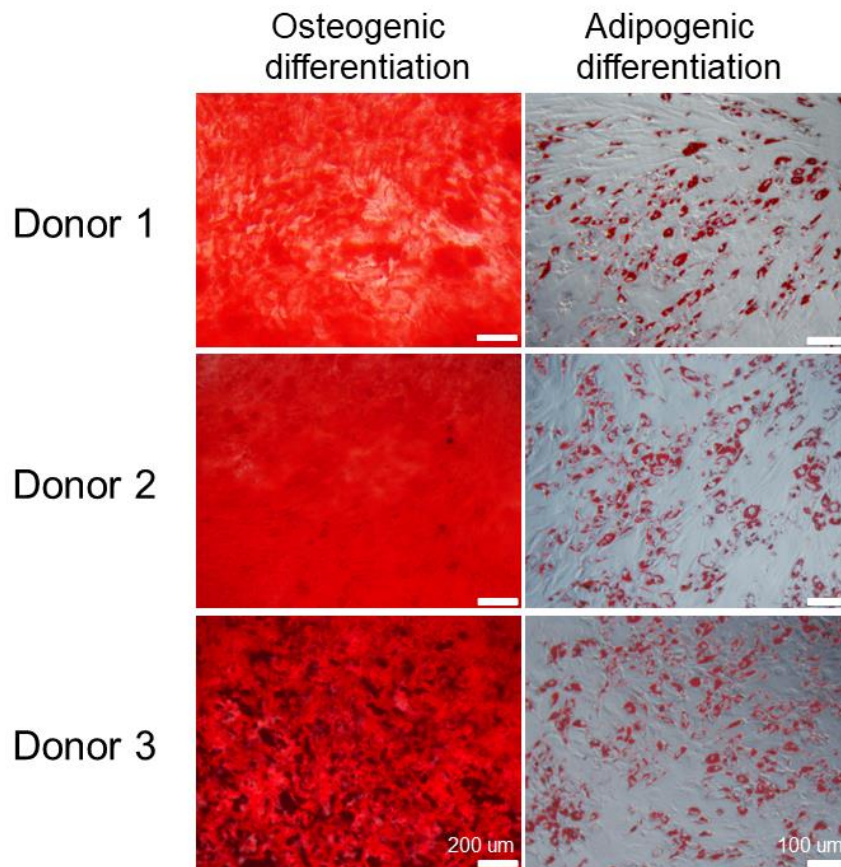

**Figure S4.** Osteogenic and Adipogenic differentiation. Left column, 21-days osteogenic induction of BMSC monolayers followed by staining with Alizarin Red S (scale bars = 200  $\mu\text{m}$ ). Right column, 21-days adipogenic induction of BMSC monolayers followed by staining with Oil Red O (scale bars = 100  $\mu\text{m}$ ).

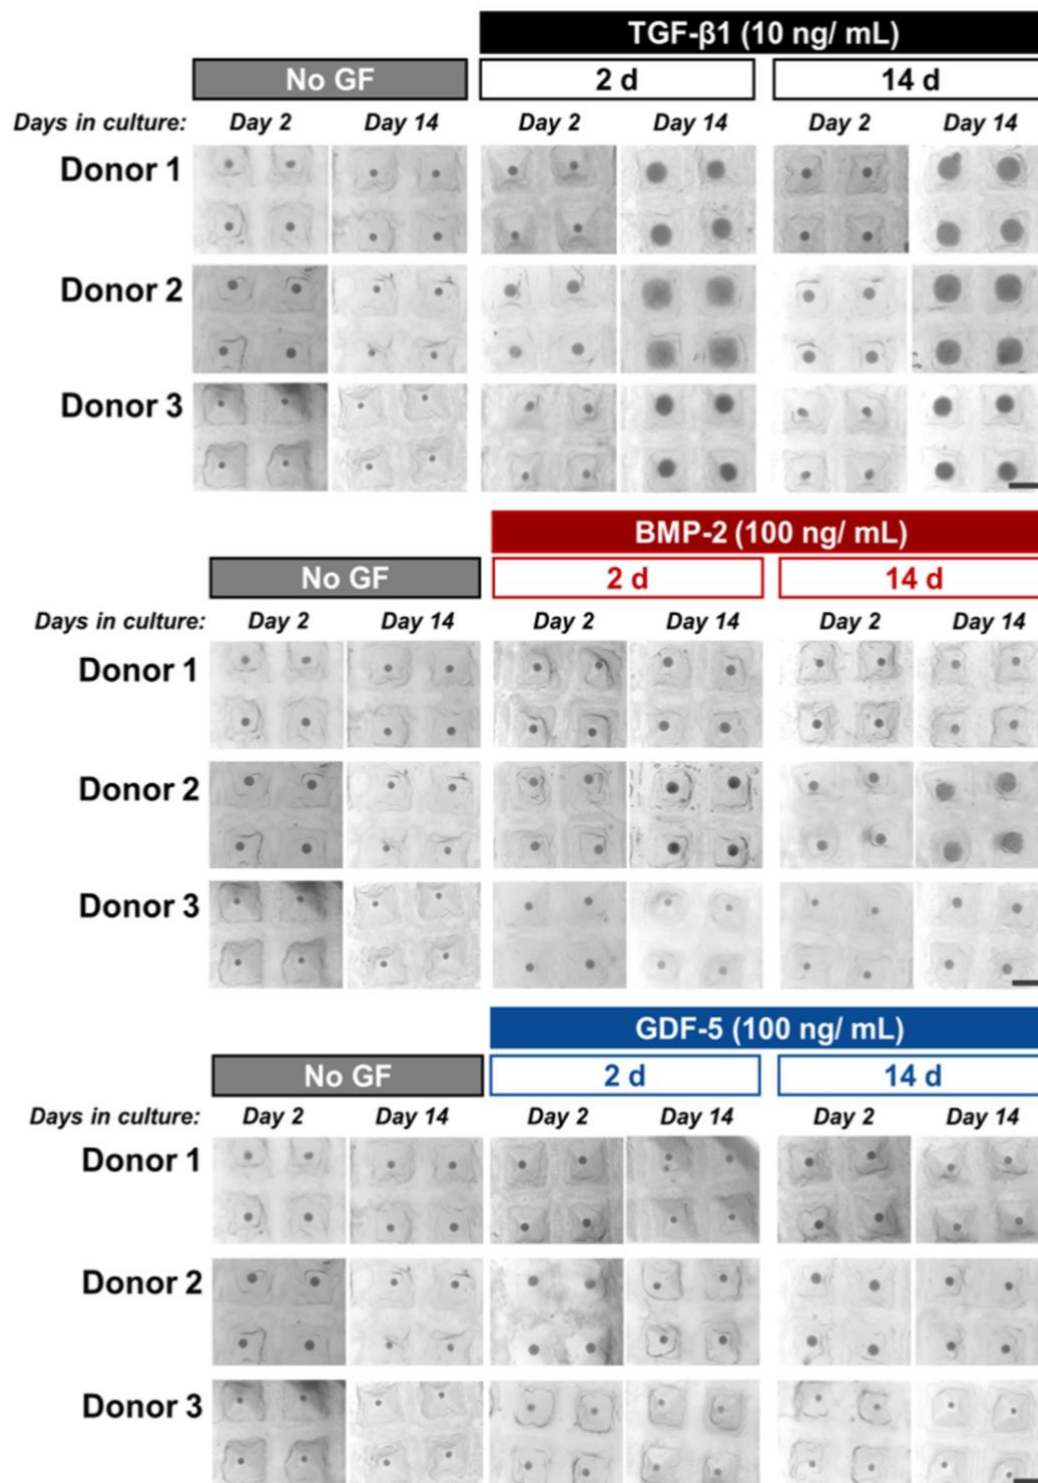

**Figure S5.** Figure S1 includes information related to Figure 1. Microscopic images of BMSC microtissues with transient (2 days) and continuous (14 days) supply of TGF- $\beta$ 1, BMP-2, and GDF-5.

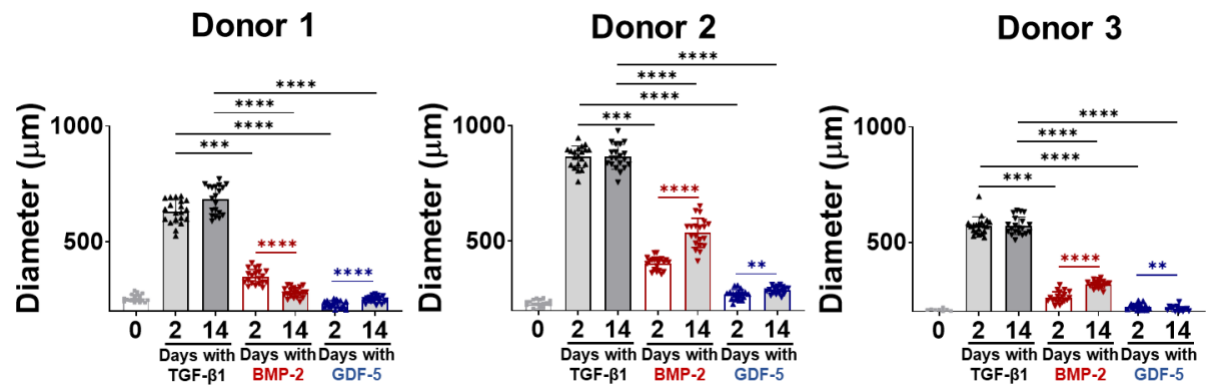

**Figure S6.** Figure S2 includes information related to Figure 1A. Comparison of microtissue diameters after 2-week culture.

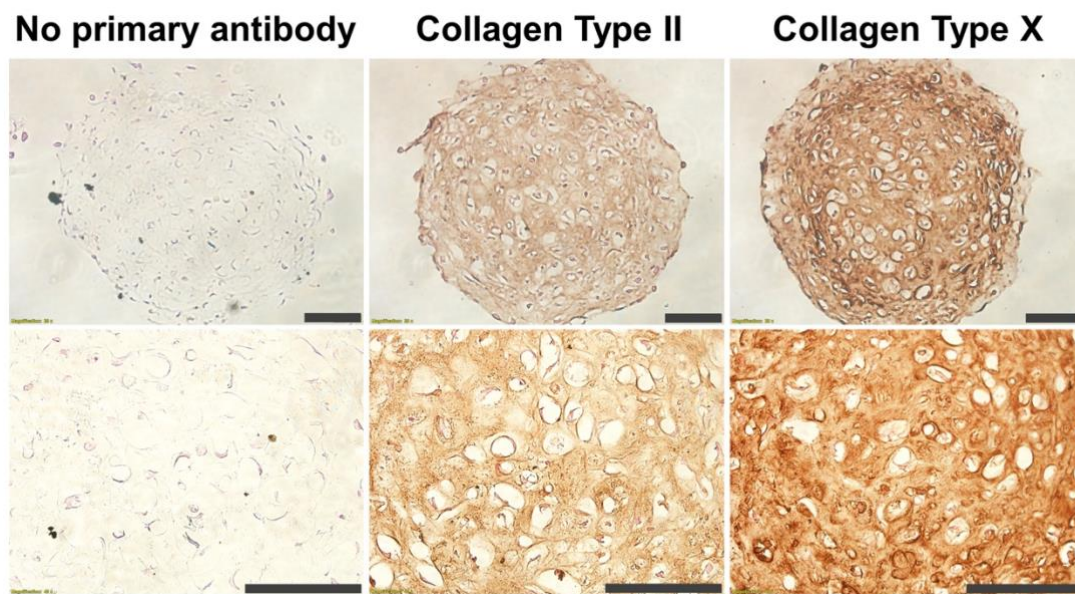

**Figure S7.** Figure S3 includes information related to Figure 3-4. Microscopic images of sample BMSC microtissue sections stained with DAB method treated with collagen type II and collagen type X primary antibodies compared to sections without primary antibody treatment. Scale bar = 100 μm
